# Supplementary material
Source: Research Square preprint supplement (doi:10.21203/rs.3.rs-9072485/v1)
Supplement: Supplementary file 1 [file d4540f43548716aa0b54bd29.docx]

Table S1  **Differences in the age-AGR relationship at admission and follow-up according to body weight status**

|  | Effect | S.E. | t |  | P | [95% CI] |
| --- | --- | --- | --- | --- | --- | --- |
| **Weight0**  Mean (- SD) | -0.087 | 0.023 | -3.703 |  | <0.001 | [-0.134, -0.041] |
| Mean | -0.056 | 0.014 | -3.972 |  | <0.001 | [-0.085, -0.028] |
| Mean (+ SD)  **Weight1**  Mean (- SD)  Mean  Mean (+ SD) | -0.026  -0.090  -0.054  -0.018 | 0.016  0.029  0.017  0.020 | -1.637  -3.082  -3.184  -0.874 |  | 0.104  0.003  0.002  0.384 | [-0.054, 0.005]  [-0.149,-0.032]  [-0.088,-0.020]  [-0.057,0.022] |

Abbreviation:Weight0weight at admission,Weight1weight at follow-up,SD standa-rd deviation,S.E.standarderror.

Table S2 **Predictors of long-term therapeutic efficacy in DMD**

|  | Univariate regression  HR 95%CI P | | | Multivariate regression  HR 95%CI P | | |
| --- | --- | --- | --- | --- | --- | --- |
| AGR1 | 4.796 | 2.298-10.011 | <0.001 | 2.947 | 1.344-4.820 | <0.001 |
| Treatment plan | 1.508 | 1.105-2.432 | 0.001 | 1.776 | 1.218-2.590 | 0.003 |
| Age of follow up  Vignos score  at admisson  creatine  NLR  total bilirubin  Weight | 0.815  1.110  1.022  1.036  0.894  0.973 | 0.734-0.905  0.968-1.274  1.005-1.068  0.836-1.293  0.335-2.251  0.948-1.034 | <0.001  0.134  0.027  0.756  0.812  0.595 | 0.788  -  1.107  -  -  - | 0.708-0.878  -  1.011-1.734  -  -  - | <0.001  -  0.019  -  -  - |

AGR1 albumin-globulin ratio at follow-up，NLR neutrophil to lymphocyte ratio

Table S3 **The mediating role of admission AGR in the association between age and Vignos score: an adjusted analysis**

|  | Estimate | 95%CI lower | 95%CI upper | P-value |
| --- | --- | --- | --- | --- |
| ACME(control) | 0.002310 | 0.000387 | 0.01 | 0.02 |
| ACME(treated) | 0.003098 | 0.000618 | 0.01 | 0.02 |
| ADE(control) | 0.015898 | 0.0007566 | 0.02 | ＜2e-16 |
| ADE(treated) | 0.016686 | 0.008160 | 0.02 | ＜2e-16 |
| Total Effect | 0.018996 | 0.009219 | 0.03 | ＜2e-16 |
| Prop.Mediated  (control) | 0.104945 | 0.019368 | 0.28 | 0.02 |
| Prop.Mediated  (treated) | 0.158594 | 0.028528 | 0.34 | 0.02 |
| ACME（average） | 0.00274 | 0.000504 | 0.01 | 0.02 |
| ADE(average) | 0.016292 | 0.007813 | 0.02 | ＜2e-16 |
| Prop.Mediated  (average) | 0.131770 | 0.023948 | 0.31 | 0.02 |

ACME=average causal mediation effect,ADE average direct effect, Prop. Mediated proportion mediated.

Table S4 **The mediating role of AGR in the association between age and Vignos score at follow-up: an adjusted analysis**

|  | Estimate | 95%CI lower | 95%CI upper | P-value |
| --- | --- | --- | --- | --- |
| ACME(control) | 0.001902 | 0.000193 | 0.01 | ＜2e-16 |
| ACME(treated) | 0.002160 | 0.000251 | 0.01 | ＜2e-16 |
| ADE(control) | 0.006505 | 0.000354 | 0.01 | 0.03 |
| ADE(treated) | 0.006764 | 0.000431 | 0.01 | 0.03 |
| Total Effect | 0.008666 | 0.002857 | 0.01 | 0.02 |
| Prop.Mediated  (control) | 0.153073 | 0.020964 | 0.66 | 0.02 |
| Prop.Mediated  (treated) | 0.203296 | 0.027122 | 0.69 | 0.02 |
| ACME（average） | 0.002031 | 0.000224 | 0.01 | ＜2e-16 |
| ADE(average) | 0.006635 | 0.000393 | 0.01 | 0.04 |
| Prop.Mediated  (average) | 0.178184 | 0.024043 | 0.67 | 0.02 |

ACME average causal mediation effect,ADE average direct effect, Prop.Mediated proportion mediated.

Table S5 **Sensitivity of the mediation effect to model specification in Cox regressi-on analysis.**

|  | Estimate | 95%CI lower | 95%CI upper | P-value |
| --- | --- | --- | --- | --- |
| ACME(control) | 0.0012012 | 0.000161 | 0.01 | ＜2e-16 |
| ACME(treated) | 0.001761 | 0.000224 | 0.01 | ＜2e-16 |
| ADE(control) | 0.004519 | 0.000349 | 0.01 | 0.03 |
| ADE(treated) | 0.005521 | 0.00327 | 0.01 | 0.04 |
| Total Effect | 0.007541 | 0.0026273 | 0.01 | 0.03 |
| Prop.Mediated  (control) | 0.132036 | 0.0180624 | 0.44 | 0.02 |
| Prop.Mediated  (treated) | 0.18221 | 0.025104 | 0.55 | 0.02 |
| ACME（average） | 0.001829 | 0.0001876 | 0.01 | ＜2e-16 |
| ADE(average) | 0.004421 | 0.000310 | 0.01 | 0.04 |
| Prop.Mediated  (average) | 0.153125 | 0.021021 | 0.45 | 0.02 |

ACME average causal mediation effect,ADE average direct effect, Prop.Mediated propo-rtion mediated.

Table S6 **Treatment efficacy in patients under 5.83 years of age**

|  | Univariate regression  HR 95%CI P | | | Multivariate regression  HR 95%CI P | | |
| --- | --- | --- | --- | --- | --- | --- |
| AGR1 | 4.692 | 1.922-11.458 | 0.001 | 3.782 | 2.031-12.784 | 0.003 |
| Treatment plan | 1.980 | 1.532-2.693 | 0.004 | 2.264 | 1.420-5.079 | 0.022 |
| Age of follow up  Vignos score  at admisson  Creatine | 0.542  1.067  1.021 | 0.447-0.657  0.976-1.168  1.006-1.421 | 0.001  0.159  0.031 | 0.578  -  1.015 | 0.489-0.684  -  1.002-1.762 | 0.001  -  0.021 |

HR hazard ratio, CI confidence interval, AGR1 albumin-globulin ratio at follow-up

Table S7 **Predictors of treatment response in the older patient cohort (age > 5.83 years)**

|  | Univariate regression  HR 95%CI P | | | Multivariate regression  HR 95%CI P | | |
| --- | --- | --- | --- | --- | --- | --- |
| AGR1 | 4.173 | 1.277-13.638 | 0.018 | 3.485 | 1.473-9.862 | 0.014 |
| Treatment plan | 1.602 | 1.357-2.215 | 0.027 | 1.446 | 1.154-2.292 | 0.032 |
| Age of follow up  Vignos score  at follow up  Creatine | 0.469  1.259  1.027 | 0.342-0.653  0.689-1.438  1.005-1.069 | 0.000  0.213  0.042 | 0.366  -  1.031 | 0.179-0.896  -  1.021-1.429 | 0.033  -  0.021 |

HR hazard ratio, CI confidence interval, AGR1 albumin-globulin ratio at follow-up

Table S8 **Treatment outcomes in children with DMD receiving prednisone**

|  | Univariate regression  HR 95%CI P | | | Multivariate regression  HR 95%CI P | | |
| --- | --- | --- | --- | --- | --- | --- |
| AGR | 5.159 | 2.228-11.634 | 0.000 | 5.593 | 1.969-32.562 | 0.044 |
| Age  Vignos score  at follow up  Creatine | 0.854  0.714  1.016 | 0.759-0.964  0.622-0.820  1.001-1.044 | 0.009  0.00  0.021 | 0.787  0.783  1.027 | 0.657-0.941  0.627-0.979  1.012-1.623 | 0.008  0.032  0.019 |

AGR albumin-globulin ratio

Table S9 **Characteristics and outcomes of children with DMD not treated with prednisone (control group)**

|  | Univariate regression  HR 95%CI P | | | Multivariate regression  HR 95%CI P | | |
| --- | --- | --- | --- | --- | --- | --- |
| AGR | 3.489 | 1.927-13.127 | 0.005 | 3.557 | 1.816-7.124 | 0.035 |
| Age  Vignos score  at follow up  Creatine | 0.674  1.112  1.009 | 0.541-0.842  0.859-1.415  1.001-1.541 | 0.000  0.445  0.023 | 0.495  -  1.143 | 0.267-916  -  1.012-1.987 | 0.025  -  0.016 |

AGR albumin-globulin ratio

Table S10 **Predictors of long-term treatment response in DMD**

|  | Univariate regression  HR 95%CI P | | | Multivariate regression  HR 95%CI P | | |
| --- | --- | --- | --- | --- | --- | --- |
| AGR | 4.932 | 2.515-9.127 | <0.001 | 5.012 | 2.014-9.976 | 0.003 |
| Treatment plan | 1.872 | 1.215-2.753 | 0.002 | 2.218 | 1.015-4.136 | 0.019 |
| Age  Vignos score at admisson  Creatine  Totalbilirubin  Weight  NLR | 0.932  1.031  1.027  1.087  0.961  0.952 | 0.874-0.981  0.912-1.213  1.061-1.521  0.936-1.351  0.931-1.091  0.785-1.188 | 0.002  0.516  0.027  0.331  0.436  0.817 | 0.951  *-*  1.131  -  -  - | 0.862-0.971  -  1.110-1.614  -  -  - | 0.011  -  0.029  -  -  - |

AGR albumin-globulin ratio ,NLR neutrophil to lymphocyte ratio
